# Supplementary material
Source: Research Square preprint supplement (doi:10.21203/rs.3.rs-9205647/v1)
Supplement: Supplementary file 1 [file 5e84b9753bea932d7263452e.docx]

### **Key Informant Interviews (KIIs)**

A total of eleven Key Informant Interviews (KIIs) were conducted, and the identified themes and subthemes were mapped to the COM-B model and corresponding TDF domains to understand behavioural determinants.

#### **Capability (Physical and Psychological Capability)**

**Theme 1: Limited Practical Skills and Confidence Among Mothers/Caregivers**

**(TDF Domain: Skills)**

Informants consistently highlighted gaps in caregivers’ practical ability to perform effective oral hygiene behaviours and to examine their children’s mouths. Although some caregivers were aware of recommended practices, many lacked the manual skills, confidence, or routine-building strategies required for successful implementation.

*“Parents worry they might hurt the child when trying to clean or check the mouth.”* (PHM2)

*“They do not have an idea about the early signs of tooth decay and the way to check the child’s mouth”* (MO 1)

Dental Surgeons noted frequent uncertainty about brushing techniques, appropriate toothpaste quantities, or how to help toddlers adopt consistent brushing routines.

*“Parents were never taught the correct brushing technique and the correct amount of toothpaste appropriate to the age of the child”* (DS 1)

Such skill-related barriers limited the effectiveness of oral hygiene behaviours and early detection of oral problems.

**Theme 2: Limited Knowledge and Misconceptions About Child Oral Health**

**(TDF Domain: Knowledge)**

Participants reported widespread gaps in knowledge of mothers/ caregivers regarding recommended oral hygiene practices, dietary contributors to caries, and the importance of routine dental check-ups. They emphasized that caregivers were often unaware that brushing should begin with the eruption of the first tooth, that fluoridated toothpaste is suitable for young children, or that sugary dietary patterns significantly increase the risk of caries.

*“We often find that mothers in these areas lack basic knowledge about proper oral hygiene practices for their children.”* (MO1)

Misconceptions such as the belief that primary teeth “do not matter” reduced motivation for oral hygiene and mouth-checking. Informants also pointed to low awareness of available public dental services, contributing to delayed attendance and treatment-seeking.

**Theme 3: Factors encouraging to maintenance of continuous education and improving skills- Continuous Education**

**(TDF Domain: Knowledge)**

Participants noted that repeated explanations and demonstrations help mothers gain confidence and maintain proper oral hygiene practices. Health professionals emphasised that practical, hands-on demonstrations are particularly effective, as consistent reminders and visual guidance reinforce learning and skill application.

*“When we repeatedly explain and demonstrate, mothers start to feel confident. They need consistent reminders.”* (HEO)

*“Education works when it is practical, and showing them the technique makes a big difference.”* (DS 2)

**Theme 4: Ease of Performing the Behaviour/ Habit Formation**

**(TDF Domain: Behavioural Regulation)**

Participants highlighted the challenges caregivers face in establishing consistent oral hygiene habits. Public Health Midwives noted that mothers often find it difficult to get children accustomed to brushing, with a single refusal sometimes discouraging further attempts. Health instructors reported that families lacking structured daily routines struggle to maintain practices, often forgetting to brush due to chaotic mornings. These findings underscore that habit formation is influenced not only by knowledge but also by the ease of integrating behaviors into daily family routines, emphasizing the need for strategies that support consistent practice and behavioural regulation.

*“Mothers say the hardest part is getting the child used to brushing. If the child refuses once, they stop trying.”* (PHM 2)

*“Families without routines find it difficult. They tell us, ‘We forget because our mornings are disordered.”* (HI 2)

#### **Opportunity (Social and Physical Opportunity)**

**Theme 5: Economic Hardship and Limited Access to Oral Health Resources**

**(TDF Domain: Environmental Context and Resources)**

Economic constraints profoundly influenced families’ oral health-related behaviours. Toothbrushes, fluoridated toothpaste, and healthier dietary choices were often perceived as unaffordable. Cheap, sugar-laden snacks were commonly used to pacify children, despite mothers’ awareness of their negative effects.

*“Toothbrushes and toothpaste for children are sometimes seen as luxuries when families struggle to meet other basic needs.”* (MO1)

*“Sugary snacks are cheaper and easily available. Even if mothers want to do the right thing, the environment pushes them toward unhealthy choices.”* (DS 2)

*“Many toddlers are given sweetened tea or biscuits several times a day because it keeps them quiet while the parent works.”* (DS 1)

*“Most of these families only come to us when the child is crying with pain. They simply cannot afford to take time off work or pay for transport just for a routine check-up.”* (DS1)

**Theme 6: Overburdened Mothers**

**(TDF Domain: Environmental Context and Resources)**

Participants reported that mothers often struggle to maintain their children’s brushing routines due to fatigue and heavy caregiving responsibilities. PHMs noted that mothers are frequently too tired at night to manage brushing when children resist, while MOHs observed that caring for multiple young children alone often leads to the toddler’s brushing being skipped.

*“Mothers are exhausted with housework and caregiving. Some say, ‘I am too tired at night to fight with the child over brushing.”* (PHM 2)

*“They handle many young children alone, so brushing for the toddler is often skipped.”* (MOH 1)

**Theme 7: Limited Access to Oral Health Resources**

**(TDF Domain: Environmental Context and Resources)**

Access to dental care was further constrained by transportation costs, loss of wages, and limited childcare support, resulting in reactive rather than preventive utilization of oral healthcare services.

*“Preventive visits are almost nonexistent in these areas. Parents wait until the decay is severe because travelling to the clinic means losing a day’s wages.”* (DS2)

**Theme 8: Inadequate Support Systems and Poor Integration of Services**

**(TDF Domains: Environmental Context and Resources)**

Participants reported several system-level barriers that hindered the effective delivery of oral health promotion such as lack of integration of oral health promotion within routine maternal and child health services. PHMs and dental teams operated with limited coordination, leading to missed opportunities for timely counselling, demonstrations, and referrals. Regular follow-up mechanisms for reinforcing brushing routines or dietary advice were lacking. They highlighted inadequate training of field staff limited their confidence and competence in providing accurate, practical guidance to caregivers.

*“We focus a lot on immunisation and nutrition, but oral health gets very little attention. If oral health were better integrated into growth monitoring and home visits, we could reach families earlier”* (MOH 2)

*“We get very limited training on oral health. Sometimes mothers ask questions, but we are not fully confident in explaining everything. WE get training that focuses on many topics, but oral health is often overlooked. Staff do their best, but without proper guidance, the messages are not consistent”* (PHM 1)

*“Different officers tell mothers different things. When the messages don’t match, parents get confused and don’t follow through.”* (HEO)

These structural gaps reduced caregivers’ ability to maintain consistent oral hygiene and dietary practices.

**Theme 9: Role of Health Personnel -Home Visits**

**(****TDF Domains: Environmental Context and Resources)**

Participants emphasized that home visits by health personnel play a crucial role in reinforcing oral health practices. They noted that direct engagement within the home environment allows caregivers to receive personalized guidance, address practical challenges, and strengthen adherence to recommended brushing routines.

*“Some families only understand the importance when we visit their homes. It feels more personal, and they take it seriously.”* (HI 1)

*“When we demonstrate brushing during a home visit, even the reluctant children get curious. It motivates the parents to try again.”* (PHM 2)

**Theme 10:** **Collaboration with Local Vendors**

**(TDF Domains: Environmental Context and Resources)**

Participants highlighted the value of engaging local vendors as partners in promoting oral health practices. They noted that shopkeepers can influence caregivers’ purchasing behaviour by displaying child-friendly oral care products prominently and guiding parents toward suitable toothbrushes and toothpaste. In these communities, vendors who are familiar with families act as informal motivators, reinforcing health messages shared by field staff. This collaboration was viewed as a practical strategy to improve access to oral hygiene products and strengthen community-level support for healthy behaviours.

*“When the shops keep toothbrushes and toothpaste at the front, mothers say it reminds them to buy. The vendor’s support really helps.”* (PHM 2)

*“Some local vendors tell us they guide parents to choose age-appropriate brushes. That small effort makes a difference.”* (HEO)

**Theme 11: Social and Cultural Influences on Oral Health Practices**

**(TDF Domain: Social Influences)**

Family and community norms exerted strong influences on oral health behaviours. Certain cultural practices, such as giving sweetened tea or sugary snacks as gestures of affection, were deeply embedded.

*“In some households, children are offered sugary snacks as a reward or to comfort them. Parents find it difficult to break these habits because everyone at home does the same.”* (HEO)

*“We see that cultural habits, like giving sweets to show affection, are deeply rooted. Telling families to stop isn’t enough. They need guidance on alternatives.”* (DS 2)

Grandparents sometimes discouraged toothpaste use or modern oral hygiene practices, creating intergenerational barriers.

“If the whole family is on board, oral hygiene becomes easier, but sometimes grandparents discourage brushing with toothpaste.” (PHM1)

Community norms normalised delayed dental attendance, further reducing the salience of preventive care.

“Families often say, ‘Why go now? The teeth look fine.’ Preventive visits are not part of their routine.” (HEO)

**Theme 12: Peer Influence and Family Support**

**(TDF Domains: Environmental Context and Resources)**

Participants highlighted that social and family contexts strongly shape caregivers’ oral health behaviours. Positive peer influence encouraged mothers to maintain proper brushing routines when they observed friends or neighbours practicing these behaviours. Family support was also critical; mothers often relied on spouses, grandparents, or other family members to manage household responsibilities, allowing time for brushing. Cultural norms and community practices influenced dietary habits, with traditions such as giving sweetened tea or sugary snacks as gestures of affection being deeply embedded. Lack of family or peer support, combined with normalized practices of delayed dental attendance and indulgent feeding habits, often hindered preventive care and consistent oral hygiene practices.

*“When mothers see their friends taking children for check-ups, they often feel motivated to do the same.”* (PHM2)

*“Some mothers say they can only bring the child if their husband or grandmother helps at home. Without support, dental visits get missed.”* (DS 1)

*“Many parents say giving sweet tea or treats is a way of showing love. Even when they know it can harm teeth, it’s hard to change because it’s part of their family routine.”* (CL 2)

#### **Motivation (Reflective and Automatic Motivation)**

**Theme 13: Parental Attitude**

**(TDF Domains: Beliefs about Consequences)**

Participants highlighted that parents’ attitudes and beliefs about oral health significantly influenced children’s oral health-related behaviours. Some parents underestimated the importance of primary teeth or believed that problems would resolve on their own, leading to delayed care and less vigilance in daily practices. These findings suggest that parental perceptions of risks and benefits strongly shape oral health behaviours in young children.

*“Even when we teach them, some parents say, ‘It’s just baby teeth; they’ll be replaced.’ That attitude makes our job harder.”* (HI 2)

*“Parents often rely on neighbours’ advice instead of following professional guidance, which delays proper care.”* (CL 1)

**Theme 14: Low Perceived Importance of Oral Health/ Attitude**

**(TDF Domains: Beliefs about Consequences)**

Oral health was often assigned low priority relative to feeding, childcare, and household management, leading to low motivation for daily brushing, dietary control, or regular mouth-checking.

*“Most mothers think oral health is not as serious as other diseases.”* (MO 2)

This perception reduced the perceived value of preventive behaviours.

**Theme 15: Parental Prioritization & Limited Time**

**(TDF Domain: Behavioural Regulation)**

Daily survival pressures, employment, domestic responsibilities, and caregiving often displaced oral hygiene from caregivers’ routine priorities. Even those motivated to engage in preventive behaviours struggled to maintain consistency. Such competing demands limited adherence to brushing routines and mouth-checking practices.

*“They have so many other worries, food, work, childcare, that oral health easily slips down the list.”* (HEO)

**Theme 16: Fear, Stress, and Negative Dental Experiences**

**(TDF Domain: Emotion)**

Fear of dental procedures, rooted in personal or shared community experiences, strongly discouraged early engagement with dental services. These emotional determinants also affected mothers’ willingness to check the child’s mouth, due to anxiety or anticipated distress.

*“Some mothers are afraid to take their children to the dental surgeon because of what they’ve heard or experienced themselves.”* (DS 2)

**Theme 17: Desire for Change and Positive Intentions**

**(TDF Domains: Intentions; Beliefs about Capabilities)**

Despite multiple barriers, informants reported meaningful caregiver interest in improving oral health when provided with clear guidance and practical demonstrations. Participants said that many mothers were willing to improve brushing routines, adopt healthier dietary behaviours, and attend dental services when supported appropriately.

*“If we give them simple demonstrations and reminders, they respond positively.”* (MOH1)

This suggests that interventions targeting confidence, capability, and accessible support may yield substantial gains in oral health behaviours.

*“When we show mothers simple techniques, how to position the child, how much toothpaste to use, they are very receptive. They just haven’t been guided before.”* (DS 2)

*“With regular follow-up and consistent messages from PHMs and dental teams, behaviour change is definitely possible.”* (DS1)

**Theme 18: Factors Encouraging Maintenance**

**(TDF: Incentives, Reinforcement)**

Participants highlighted several reinforcing factors that helped caregivers maintain oral health routines over time. Positive feedback from health workers, visible improvements in the child’s oral condition, and praise from family members were described as strong motivators. For some mothers, small rewards or recognition during clinic visits encouraged continued brushing and reduced sugary snacks. Regular follow-up by health personnel and community appreciation also helped sustain these behaviours, reinforcing that consistent effort leads to positive outcomes. These incentives played a key role in strengthening long-term adherence to recommended oral health practices.

*“When we praise mothers for keeping up the brushing, they feel proud and continue the routine.”* (PHM 1)

*“When we tell them, ‘Your child’s teeth look much better than last time,’ they take it seriously and maintain the brushing.”* (DS 2)

***“****Even small incentives, like recognizing a mother during a clinic session, make her feel valued and motivate her to continue good habits.”* (MO 2)

*“Follow-up visits act as reminders. When we return and see progress, parents feel rewarded and keep up the effort.”* (HI 2)

**Table 3: Key Informant Interview Source Triangulation Matrix**

| **COM-B** | **TDF** | **Theme** | **Oral Health Related Behaviours** | | | | **Source Triangulation** | | | | | |
| --- | --- | --- | --- | --- | --- | --- | --- | --- | --- | --- | --- | --- |
| B1 | B2 | B3 | B4 | A | B | C | D | E | F |
| **Capability (**Physical  & Psychological) | skills | **Theme 1:**  Limited Practical Skills and Confidence in mothers/ caregivers | ✓ |  |  | ✓ | ✓ | ✓ | ✓ | ✓ | ✓ |  |
| Knowledge | **Theme:2**  Limited Knowledge and Misconceptions about Child Oral Health | ✓ | ✓ | ✓ | ✓ | ✓ | ✓ | ✓ | ✓ | ✓ | ✓ |
| **Theme 3:**  Factors Encouraging to Maintenance of Continuous Education and Improving Skills | ✓ | ✓ | ✓ | ✓ | ✓ | ✓ | ✓ | ✓ |  |  |
| Behavioural Regulation | **Theme 4**  Ease of Performing the Behaviour  Habit Formation | ✓ | ✓ | ✓ | ✓ | ✓ |  | ✓ | ✓ | ✓ |  |
| **Opportunity**  (Social & Physical) | Environmental Context and Resources | **Theme 5:**  Economic Hardships or Affordability | ✓ | ✓ | ✓ | ✓ | ✓ | ✓ | ✓ | ✓ | ✓ | ✓ |
| **Theme 6:**  Overburdened Mothers | ✓ | ✓ | ✓ | ✓ |  |  | ✓ | ✓ |  | ✓ |
| **Theme 7:**  Limited Access to Oral Health Resources | ✓ | ✓ | ✓ | ✓ | ✓ | ✓ |  | ✓ |  |  |
| **Theme 8:**  Inadequate Support Systems and Service Integration | ✓ | ✓ | ✓ | ✓ | ✓ | ✓ | ✓ | ✓ |  | ✓ |
| **Theme 9**:  Role of Health Personnel  Home Visits | ✓ | ✓ | ✓ | ✓ | ✓ | ✓ | ✓ | ✓ | ✓ | ✓ |
| **Theme 10:** Collaboration with Local Vendors | ✓ | ✓ | ✓ | ✓ | ✓ | ✓ | ✓ | ✓ | ✓ | ✓ |
| Social Influences | **Theme 11:**  Social and Cultural Influences on Oral Health Practices | ✓ | ✓ | ✓ | ✓ | ✓ | ✓ | ✓ | ✓ | ✓ | ✓ |
| **Theme 12:**  Peer Influence and Family Support | ✓ | ✓ | ✓ | ✓ | ✓ |  | ✓ | ✓ | ✓ | ✓ |
| **Motivation**  (Reflective & Automatic) | Beliefs about Consequences | **Theme 13:** Parental Attitude | ✓ | ✓ | ✓ | ✓ | ✓ | ✓ | ✓ | ✓ |  | ✓ |
| **Theme 14:**  Low Perceived Importance of Oral Health | ✓ | ✓ | ✓ | ✓ | ✓ | ✓ | ✓ | ✓ | ✓ |  |
| Goals & Intentions | **Theme 15:**  Parental Prioritization &  Limited Time | ✓ | ✓ | ✓ | ✓ |  |  | ✓ |  | ✓ | ✓ |
| Emotion | **Theme 16:**  Fear, Stress, and Negative Dental Experiences | ✓ | ✓ | ✓ | ✓ | ✓ | ✓ | ✓ |  | ✓ |  |
| Intentions; Beliefs about Capabilities | **Theme 17:**  Desire for Change and Positive Intentions | ✓ | ✓ | ✓ | ✓ | ✓ | ✓ | ✓ | ✓ | ✓ | ✓ |
| Incentives Reinforcement | **Theme 18:**  Factors Encouraging Maintenance | ✓ | ✓ | ✓ | ✓ | ✓ | ✓ | ✓ | ✓ | ✓ |  |

*B1- Tooth Brushing B2- Dietary Habits B3- Oral Health care Seeking Behaviours B4- Child’s mouth examination by mother/baregiver*

*A- Medical Officers, B-Dental Surgeons- CDC, C-Public Health Midwives(PHMM), D-Health Education Officer (HEO), E-Health instructor (HI), F-Community Leader (CL)*
