# Supplementary material
Source: Research Square preprint supplement (doi:10.21203/rs.3.rs-9205647/v1)
Supplement: Supplementary file 2 [file ac5dc026364a7209343c0eb1.docx]

**Supplementary Information**

This inline version contains supplementary materials available as a separate supplementary file.
