# Supplementary material
Source: Research Square preprint supplement (doi:10.21203/rs.3.rs-9205647/v1)
Supplement: Supplementary file 3 [file c7f9c3e61fd779ef3cbc586a.docx]

**Table 1. Sociodemographic characteristics of caregivers who participated in FGDs (n = 34)**

| **Characteristic** | **Category** | **n (%)** | **Mean ± SD / Range** | |
| --- | --- | --- | --- | --- |
| **Age of caregiver (years)** |  |  | | 29.3 ± 5.2 (20–41) |
|  |  |  | |  |
| **Ethnicity** | Sinhala | 15 (44.1) | |  |
|  | Muslim | 10 (29.4) | |  |
|  | Tamil | 9 (26.5) | |  |
|  |  |  | |  |
| **Educational level** | Primary | 7 (20.6) | |  |
|  | Up to GCE O/L (not completed) | 15 (44.1) | |  |
|  | Passed GCE O/L | 7 (20.6) | |  |
|  | Up to GCE A/L (not completed) | 5 (14.7) | |  |
|  |  |  | |  |
| **Child’s age (months)** |  |  | | 26.0 ± 6.1 (16–35) |
|  |  |  | |  |
| **Child’s gender** | Male | 19 (55.9) | |  |
|  | Female | 15 (44.1) | |  |

*Abbreviations: O/L, Ordinary Level; A/L, Advanced Level.*
